# Supplementary material for: Uncertainty indication in soil function maps – transparent and easy-to-use information to support sustainable use of soil resources
Source: Copernicus journal article supplement (doi:10.5194/soil-4-123-2018), 2018-05-29
Supplement: Supplementary file 1 [file soil-4-123-2018-supplement.pdf]

Supplement of SOIL, 4, 123–139, 2018  
<https://doi.org/10.5194/soil-4-123-2018-supplement>  
© Author(s) 2018. This work is distributed under  
the Creative Commons Attribution 4.0 License.

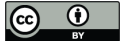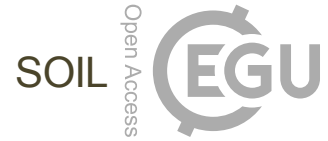

*Supplement of*

## **Uncertainty indication in soil function maps – transparent and easy-to-use information to support sustainable use of soil resources**

**Lucie Greiner et al.**

*Correspondence to:* Lucie Greiner ([lucie.greiner@agroscope.admin.ch](mailto:lucie.greiner@agroscope.admin.ch))

The copyright of individual parts of the supplement might differ from the CC BY 4.0 License.

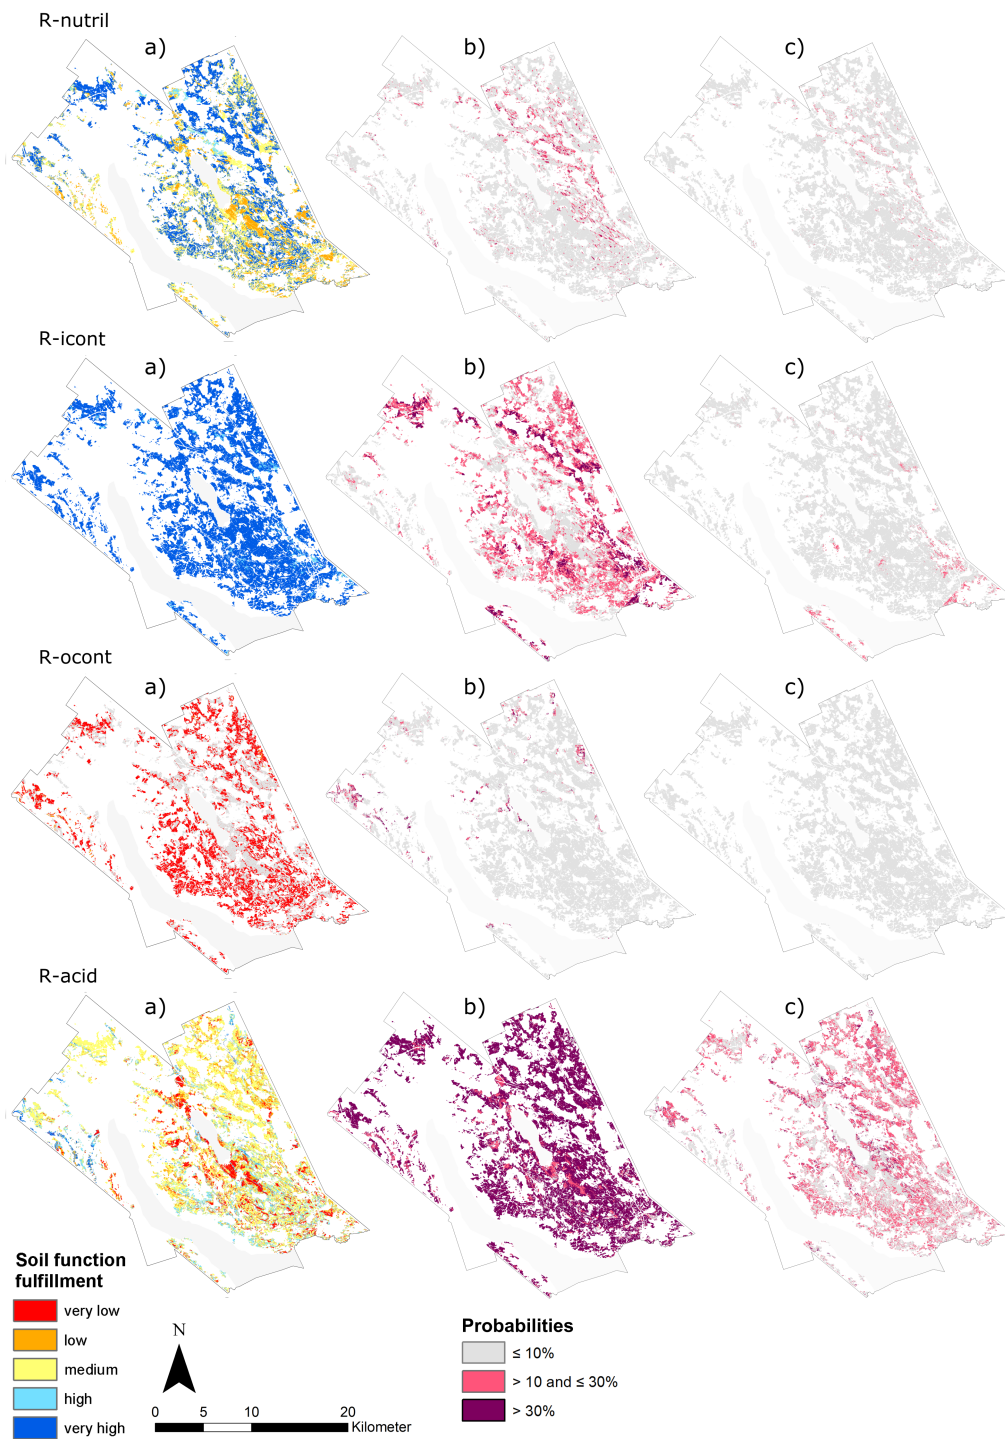

**Figure S1:** Regulation functions maps for the agricultural land of the case study area and indication of their uncertainties in the ordinal scale: a) mean SFF scores and b) probability that the mean SFF score of a raster cell deviates in the ordinal scale for  $\pm 1$  or c)  $\pm 2$  or more SFF units (raster cells  $20 \times 20m$ ,  $N = 1000$  simulations)

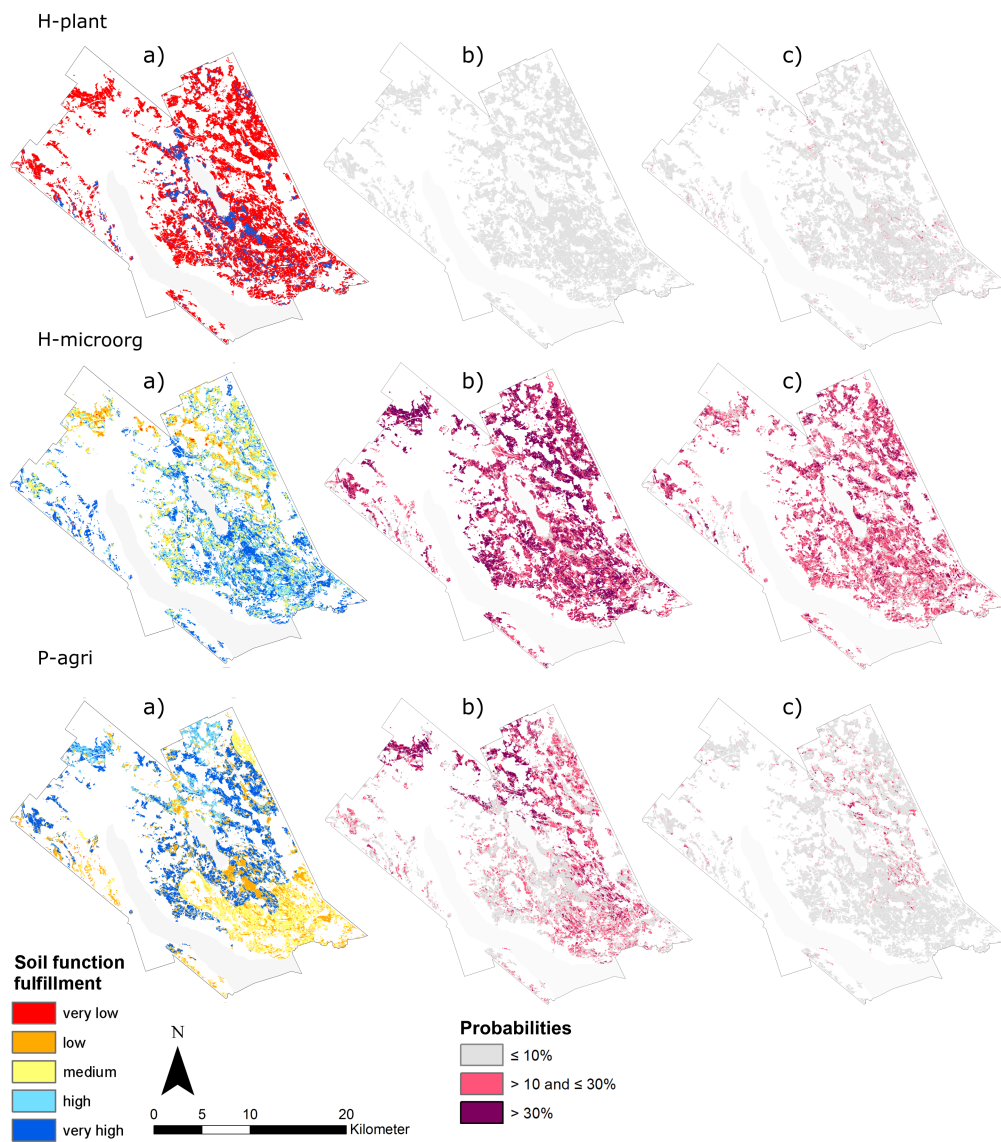

**Figure S2:** Habitat functions and production function maps for the agricultural land of the case study area and indication of their uncertainties in the ordinal scale: a) mean SFF scores and b) probability that the mean SFF score of a raster cell deviates in the ordinal scale for  $\pm 1$  or c)  $\pm 2$  or more SFF units (raster cells  $20 \times 20m$ ,  $N = 1000$  simulations).
